# Supplementary material
Source: PubMed Central journal article supplement (PMC8788678)
Supplement: aem.01655-21-s0001.pdf [file aem.01655-21-s0001.pdf]

## Supplemental Material

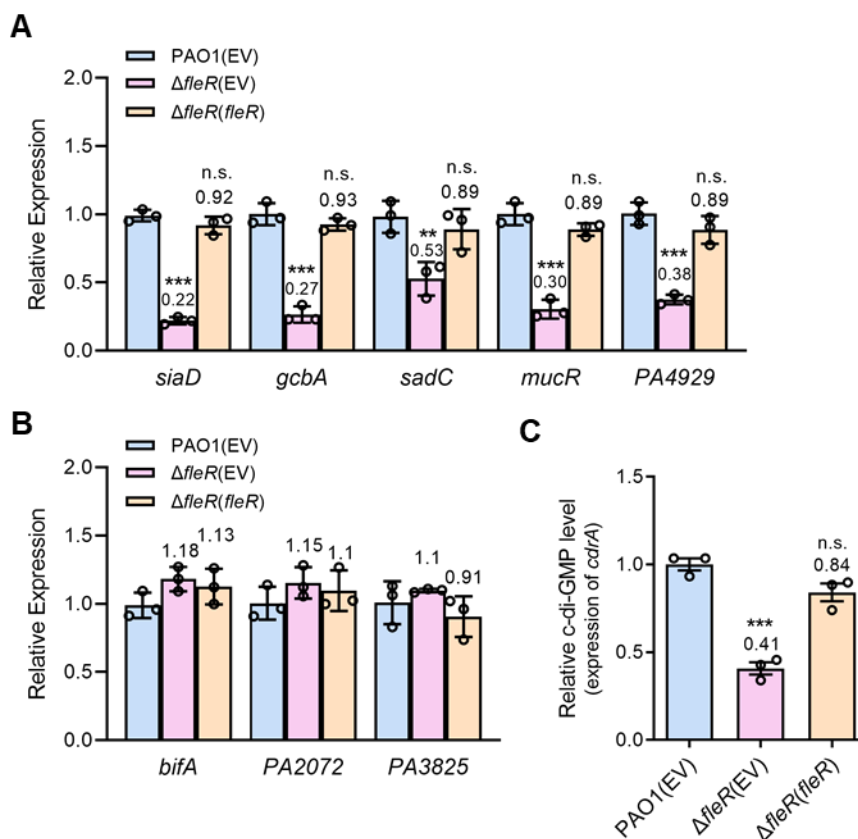

**Figure S1. Intracellular c-di-GMP synthesis is inhibited in the absence of FleR.**

(A) Relative expression of DGC genes measured by RT-qPCR in PAO1,  $\Delta fleR$  and  $\Delta fleR(fleR)$  strains. (B) Relative expression of PDE genes measured by RT-qPCR in PAO1,  $\Delta fleR$  and  $\Delta fleR(fleR)$  strains. (C) Relative intracellular c-di-GMP levels in PAO1,  $\Delta fleR$  and  $\Delta fleR(fleR)$  strains were determined by measuring the relative expression of *cdrA*. Data are represented as the mean  $\pm$  SD (n = 3). \*\*\*  $p < 0.001$  versus PAO1(EV) based on paired Student's *t* test. n.s.: not significant. EV: Empty vector for the control.

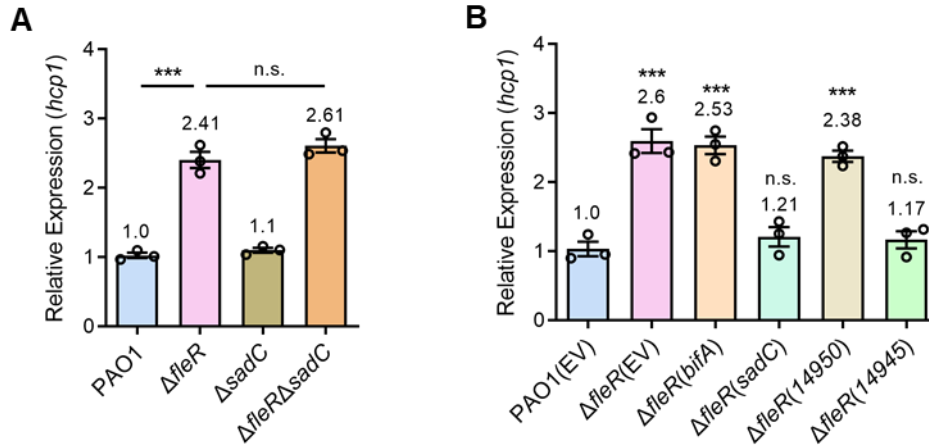

**Figure S2. FleR regulates the expression of *hcp1* in a c-di-GMP-dependent manner.** (A) Relative expression of *tse1* measured by RT-qPCR in the PAO1,  $\Delta fleR$ ,  $\Delta sadC$  and  $\Delta fleR \Delta sadC$  strains. (B) Relative expression of *tse1* measured by RT-qPCR in the strains of PAO1,  $\Delta fleR$ , and  $\Delta fleR$  with ectopic expression of DGCs and PDEs. Data are represented as the mean  $\pm$  SD (n = 3). \*\*\*  $p < 0.001$  versus the indicated group based on paired Student's *t* test (A) or versus PAO1(EV) based on one-way ANOVA (B). n.s.: not significant. EV: Empty vector for the control.

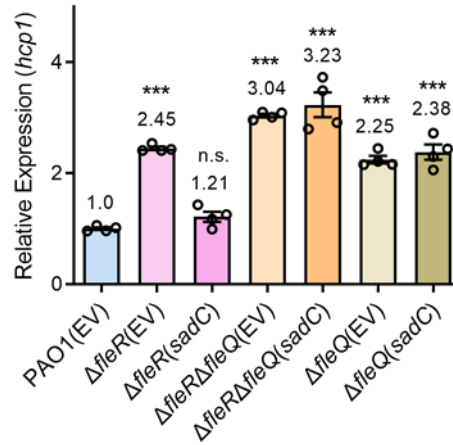

**Figure S3. Relative expression of *hcp1* measured by RT-qPCR in the indicated PAO1 strains.** Data are represented as the mean  $\pm$  SD (n = 3). \*\*\* p<0.001 versus PAO1(EV) based on one-way ANOVA. n.s.: not significant. EV: Empty vector for the control.

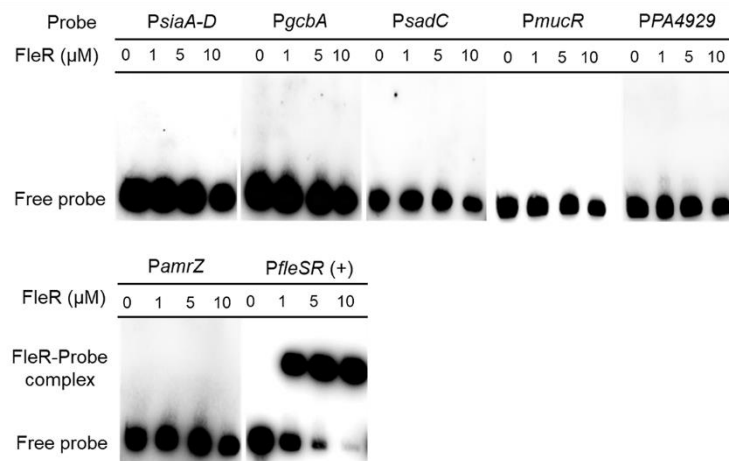

**Figure S4. EMSA examination of the binding of FleR to the promoters of DGC genes and *amrZ*.** Binding of FleR to its own promoter (*PfleSR*) serves as the positive control.

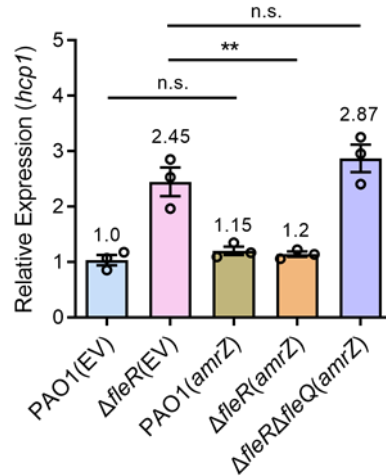

**Figure S5. Relative expression of *hcp1* measured by RT-qPCR in the strains of PAO1 and  $\Delta fleR$  with ectopic expression of *amrZ*.** Data are represented as the mean  $\pm$  SD (n = 3). \*\* p<0.01 versus PAO1(EV) or  $\Delta fleR$ (EV) based on paired Student's *t* test. n.s.: not significant. EV: Empty vector for the control.

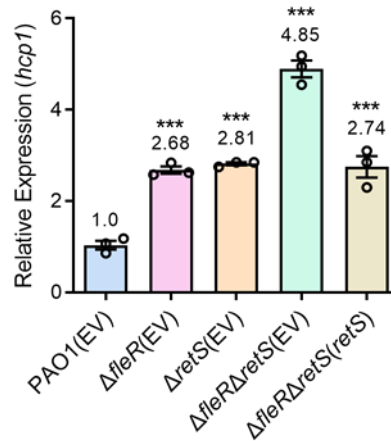

**Figure S6. Relative expression of *hcp1* measured by RT-qPCR in the PAO1,  $\Delta fleR$ ,  $\Delta retS$  and  $\Delta fleR \Delta retS$  strains.** Data are represented as the mean  $\pm$  SD (n = 3). \*\*\* p<0.001 versus PAO1(EV) based on one-way ANOVA. EV: Empty vector for the control.

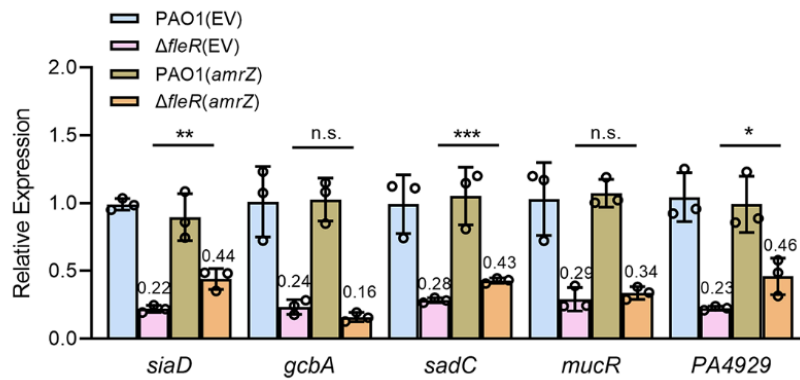

**Figure S7. Relative expression of DGC genes in PAO1,  $\Delta fleR$  strains with or without ectopic expression of *amrZ*.** Data are represented as the mean  $\pm$  SD (n = 3).

\*  $p < 0.05$ , \*\*  $p < 0.01$ , \*\*\*  $p < 0.001$  versus  $\Delta fleR(EV)$  based on paired Student's *t* test.

n.s.: not significant. EV: Empty vector for the control.

**Table S1.** Full list of differentially expressed genes ( $\text{Log}_2$ fold change  $\geq 1.2$ ) in the *fleR* mutant compared to the wild-type strain. Significantly differentially expressed genes are determined by Cufflinks after Benjamini-Hochberg correction. The fold change is the ratio of the mutant FPKM to the wild-type FPKM.

| Locus tag | Gene name     | Fold chang | Gene function                                | Number of pathway // Name of pathway |
|-----------|---------------|------------|----------------------------------------------|--------------------------------------|
| PA0045    | <i>PA0045</i> | -1.990     | curli production assembly protein CsgG       | -                                    |
| PA0046    | <i>PA0046</i> | -2.690     | DUF4810 domain-containing protein            | -                                    |
| PA0047    | <i>PA0047</i> | -1.234     | lipoprotein                                  | -                                    |
| PA0075    | <i>pppA</i>   | 1.541      | serine/threonine phosphatase                 | ko03070//Bacterial secretion system  |
| PA0083    | <i>PA0083</i> | 1.227      | type VI secretion system-associated protein  | -                                    |
| PA0084    | <i>PA0084</i> | 1.305      | EvpB/family type VI secretion protein        | -                                    |
| PA0085    | <i>hcp1</i>   | 1.285      | protein secretion apparatus assembly protein | ko03070//Bacterial secretion system  |
| PA0087    | <i>PA0087</i> | 1.224      | type VI secretion system lysozyme            | -                                    |
| PA0089    | <i>PA0089</i> | 1.350      | type VI secretion protein                    |                                      |
| PA0090    | <i>clpVI</i>  | 1.822      | secretion protein ClpV1                      | ko03070//Bacterial secretion system  |
| PA0091    | <i>vgrG1</i>  | 1.612      | type VI secretion system protein VgrG        | ko03070//Bacterial secretion system  |
| PA0103    | <i>PA0103</i> | 2.038      | sulfate transporter                          | -                                    |
| PA0117    | <i>PA0117</i> | -1.846     | short-chain dehydrogenase                    | -                                    |
| PA0119    | <i>PA0119</i> | -1.876     | C4-dicarboxylate transporter 1               | ko02020//Two-component system        |
| PA0122    | <i>PA0122</i> | -1.296     | hemolysin                                    | -                                    |
| PA0123    | <i>PA0123</i> | -1.377     | transcriptional regulator                    | -                                    |
| PA0126    | <i>PA0126</i> | -1.203     | Uncharacterised protein                      | -                                    |
| PA0128    | <i>PA0128</i> | 1.725      | alkylphosphonate utilization protein         | -                                    |
| PA0137    | <i>PA0137</i> | 1.395      | ABC transporter permease                     | -                                    |
| PA0162    | <i>opdC</i>   | -1.464     | histidine porin OpdC                         | -                                    |

|        |               |        |                                                                         |                                                             |
|--------|---------------|--------|-------------------------------------------------------------------------|-------------------------------------------------------------|
| PA0169 | <i>PA0169</i> | -2.938 | GGDEF domain-containing protein                                         | -                                                           |
| PA0170 | <i>PA0170</i> | -2.323 | Fe-S oxidoreductase                                                     | -                                                           |
| PA0171 | <i>PA0171</i> | -3.016 | Uncharacterized protein PAE221_01065                                    | -                                                           |
| PA0172 | <i>PA0172</i> | -1.313 | histidine kinase                                                        | -                                                           |
| PA0179 | <i>PA0179</i> | -1.227 | two-component response regulator                                        | ko02020//Two-component system;ko02030//Bacterial chemotaxis |
| PA0195 | <i>pntAA</i>  | 1.290  | NAD(P) transhydrogenase subunit alpha                                   | ko00760//Nicotinate and nicotinamide metabolism             |
| PA0199 | <i>exbD1</i>  | -1.205 | biopolymer transport protein ExbD                                       | -                                                           |
| PA0200 | <i>PA0200</i> | -1.284 | DUF3079 domain-containing protein                                       | -                                                           |
| PA0215 | <i>PA0215</i> | 1.533  | malonate transporter MadL                                               | -                                                           |
| PA0217 | <i>PA0217</i> | 1.247  | transcriptional regulator                                               | -                                                           |
| PA0222 | <i>PA0222</i> | -1.435 | ABC transporter, periplasmic spermidine putrescine-binding protein PotD | -                                                           |
| PA0238 | <i>PA0238</i> | 2.137  | xylose isomerase                                                        | -                                                           |
| PA0251 | <i>PA0251</i> | 1.858  | suppressor of fused family protein                                      | -                                                           |
| PA0252 | <i>PA0252</i> | -1.998 | Uncharacterized protein PAE221_00084                                    | -                                                           |
| PA0263 | <i>hcpC</i>   | -1.311 | major exported protein, partial                                         | ko03070//Bacterial secretion system                         |
| PA0280 | <i>cysA</i>   | -2.114 | sulfate.thiosulfate ABC transporter ATP-binding protein CysA            | ko02010//ABC transporters;ko00920//Sulfur metabolism        |
| PA0281 | <i>cysW</i>   | -1.678 | sulfate transporter CysW                                                | ko02010//ABC transporters;ko00920//Sulfur metabolism        |
| PA0282 | <i>cysT</i>   | -2.519 | sulfate transporter CysT                                                | ko02010//ABC transporters;ko00920//Sulfur metabolism        |
| PA0320 | <i>PA0320</i> | -1.614 | TIGR00156 family protein                                                | -                                                           |
| PA0323 | <i>PA0323</i> | -1.629 | Putrescine-binding periplasmic protein precursor                        | ko02010//ABC transporters                                   |

|        |               |        |                                                            |                                                      |
|--------|---------------|--------|------------------------------------------------------------|------------------------------------------------------|
| PA0451 | <i>PA0451</i> | 1.312  | peptidase                                                  | -                                                    |
| PA0471 | <i>PA0471</i> | -1.628 | transmembrane sensor                                       | -                                                    |
| PA0472 | <i>PA0472</i> | -1.899 | RNA polymerase sigma factor                                | -                                                    |
| PA0493 | <i>PA0493</i> | 13.316 | probable biotin-requiring enzyme                           | -                                                    |
| PA0513 | <i>PA0513</i> | -1.387 | heme d1 biosynthesis protein NirG                          | -                                                    |
| PA0517 | <i>nirC</i>   | -1.356 | cytochrome c55X                                            | -                                                    |
| PA0519 | <i>nirS</i>   | -1.273 | nitrite reductase                                          | ko00910//Nitrogen metabolism                         |
| PA0524 | <i>norB</i>   | -1.310 | nitric oxide reductase subunit B                           | ko00910//Nitrogen metabolism                         |
| PA0534 | <i>PA0534</i> | -1.867 | Oxidoreductase                                             | -                                                    |
| PA0579 | <i>rpsU</i>   | 1.431  | 30S ribosomal protein S21                                  | ko03010//Ribosome                                    |
| PA0672 | <i>hemO</i>   | -1.450 | heme oxygenase                                             | -                                                    |
| PA0674 | <i>vreA</i>   | -4.254 | VreA                                                       | -                                                    |
| PA0680 | <i>PA0680</i> | 3.410  | HxcV pseudopilin                                           | ko03070//Bacterial secretion system                  |
| PA0734 | <i>PA0734</i> | 1.949  | cysteine-rich CWC family protein                           | -                                                    |
| PA0744 | <i>PA0744</i> | -1.964 | enoyl-CoA hydratase                                        | -                                                    |
| PA0745 | <i>PA0745</i> | -1.656 | enoyl-CoA hydratase                                        | -                                                    |
| PA0746 | <i>PA0746</i> | -1.396 | acyl-CoA dehydrogenase                                     | ko00281//Geraniol degradation                        |
| PA0753 | <i>PA0753</i> | -2.888 | tripartite tricarboxylate transporter TctB family protein  | ko02020//Two-component system                        |
| PA0754 | <i>PA0754</i> | -1.291 | C4-dicarboxylate ABC transporter substrate-binding protein | ko02020//Two-component system                        |
| PA0755 | <i>opdH</i>   | -1.437 | cis-aconitate porin OpdH                                   | -                                                    |
| PA0756 | <i>PA0756</i> | 1.810  | two-component response regulator                           | ko02020//Two-component system                        |
| PA0793 | <i>PA0793</i> | -1.726 | 3-methylitaconate isomerase                                | -                                                    |
| PA0794 | <i>PA0794</i> | -2.059 | aconitate hydratase                                        | ko01230//Biosynthesis of amino acids;ko01200//Carbon |



|        |               |        |                                                                    |                                                                                                                                                          |
|--------|---------------|--------|--------------------------------------------------------------------|----------------------------------------------------------------------------------------------------------------------------------------------------------|
|        |               |        |                                                                    | metabolism;ko00630//Glyoxylate and dicarboxylate metabolism;ko00020//Citrate cycle (TCA cycle);ko01210//2-Oxocarboxylic acid metabolism                  |
| PA0795 | <i>prpC</i>   | -2.380 | methylcitrate synthase                                             | ko00640//Propanoate metabolism                                                                                                                           |
| PA0796 | <i>prpB</i>   | -1.562 | 2-methylisocitrate lyase                                           | ko00640//Propanoate metabolism                                                                                                                           |
| PA0837 | <i>slyD</i>   | 1.240  | peptidyl-prolyl cis-trans isomerase SlyD                           | -                                                                                                                                                        |
| PA0855 | <i>PA0855</i> | -1.275 | Protein of uncharacterised function (DUF2804)                      | -                                                                                                                                                        |
|        |               |        |                                                                    | ko00350//Tyrosine metabolism;ko00360//Phenylalanine metabolism;ko00130//Ubiquinone and other terpenoid-quinone biosynthesis                              |
| PA0865 | <i>hpd</i>    | -1.350 | 4-hydroxyphenylpyruvate dioxygenase                                | -                                                                                                                                                        |
| PA0866 | <i>aroP2</i>  | -2.383 | aromatic amino acid transporter AroP                               | ko01200//Carbon metabolism;ko00620//Pyruvate metabolism;ko00640//Propanoate metabolism;ko00010//Glycolysis / Gluconeogenesis;ko00680//Methane metabolism |
| PA0887 | <i>acsA</i>   | -3.339 | acetyl-CoA synthetase                                              |                                                                                                                                                          |
| PA0909 | <i>PA0909</i> | 2.979  | putative membrane protein                                          | -                                                                                                                                                        |
| PA0939 | <i>PA0939</i> | -1.714 | Rho-specific inhibitor of transcription termination YaeO           | -                                                                                                                                                        |
| PA0960 | <i>PA0960</i> | 1.278  | <i>slyX</i> protein                                                | -                                                                                                                                                        |
| PA1058 | <i>PA1058</i> | 12.878 | monovalent cation/H <sup>+</sup> antiporter subunit F              | -                                                                                                                                                        |
| PA1070 | <i>braG</i>   | -1.288 | branched-chain amino acid ABC transporter ATP-binding protein BraG | ko02010//ABC transporters                                                                                                                                |
| PA1071 | <i>braF</i>   | -1.259 | branched-chain amino acid ABC transporter ATP-binding protein BraF | ko02010//ABC transporters                                                                                                                                |

|        |               |        |                                                                        |                                                                                                    |
|--------|---------------|--------|------------------------------------------------------------------------|----------------------------------------------------------------------------------------------------|
| PA1077 | <i>flgB</i>   | -4.925 | flagellar basal-body rod protein FlgB                                  | ko02040//Flagellar assembly                                                                        |
| PA1078 | <i>flgC</i>   | -4.174 | flagellar basal body rod protein FlgC                                  | ko02040//Flagellar assembly                                                                        |
| PA1079 | <i>flgD</i>   | -4.029 | flagellar basal body rod modification protein                          | ko02040//Flagellar assembly                                                                        |
| PA1080 | <i>flgE</i>   | -4.774 | flagellar hook protein FlgE                                            | ko02040//Flagellar assembly                                                                        |
| PA1081 | <i>flgF</i>   | -4.232 | flagellar basal body rod protein FlgF                                  | ko02040//Flagellar assembly                                                                        |
| PA1092 | <i>fliC</i>   | -1.763 | flagellin type B                                                       | ko02020//Two-component system;ko02040//Flagellar assembly                                          |
| PA1099 | <i>fleR</i>   | -5.866 | two-component response regulator                                       | ko02020//Two-component system                                                                      |
| PA1132 | <i>PA1132</i> | -1.441 | hypothetical protein                                                   | -                                                                                                  |
| PA1137 | <i>PA1137</i> | -1.860 | oxidoreductase                                                         | -                                                                                                  |
| PA1168 | <i>PA1168</i> | -1.396 | Uncharacterised protein                                                | -                                                                                                  |
| PA1196 | <i>PA1196</i> | -2.201 | transcriptional regulator                                              | -                                                                                                  |
| PA1197 | <i>PA1197</i> | -1.565 | NAD-dependent protein deacylase                                        | -                                                                                                  |
| PA1213 | <i>PA1213</i> | -1.400 | clavaminic acid synthetase                                             | -                                                                                                  |
| PA1240 | <i>PA1240</i> | -1.955 | enoyl-CoA hydratase                                                    | -                                                                                                  |
| PA1254 | <i>PA1254</i> | -1.709 | dihydrodipicolinate synthetase                                         | ko01230//Biosynthesis of amino acids;ko00300//Lysine biosynthesis;ko00261//Monobactam biosynthesis |
| PA1255 | <i>PA1255</i> | -1.545 | trans-3-hydroxy-L-proline dehydratase                                  | -                                                                                                  |
| PA1266 | <i>PA1266</i> | -2.065 | oxidoreductase                                                         | -                                                                                                  |
| PA1267 | <i>PA1267</i> | -1.839 | FAD binding domain protein                                             | -                                                                                                  |
| PA1275 | <i>cobD</i>   | -1.843 | cobalamin biosynthesis protein                                         | ko00860//Porphyrin and chlorophyll metabolism                                                      |
| PA1276 | <i>cobC</i>   | -1.723 | threonine-phosphate decarboxylase                                      | ko00860//Porphyrin and chlorophyll metabolism                                                      |
| PA1277 | <i>cobQ</i>   | -1.716 | cobyric acid synthase                                                  | ko00860//Porphyrin and chlorophyll metabolism                                                      |
| PA1279 | <i>cobU</i>   | -1.572 | nicotinate-nucleotide--dimethylbenzimidazole phosphoribosyltransferase | ko00860//Porphyrin and chlorophyll metabolism                                                      |

|        |               |        |                                                                          |                                                                                                                                                                                                                                                          |
|--------|---------------|--------|--------------------------------------------------------------------------|----------------------------------------------------------------------------------------------------------------------------------------------------------------------------------------------------------------------------------------------------------|
| PA1281 | <i>cobV</i>   | -3.316 | adenosylcobinamide-GDP ribazoletransferase                               | ko00860//Porphyrin and chlorophyll metabolism                                                                                                                                                                                                            |
| PA1282 | <i>PA1282</i> | -1.803 | MFS transporter                                                          | -                                                                                                                                                                                                                                                        |
| PA1286 | <i>PA1286</i> | 1.818  | major facilitator superfamily transporter                                | -                                                                                                                                                                                                                                                        |
| PA1319 | <i>cyoC</i>   | -1.284 | cytochrome o ubiquinol oxidase subunit III                               | ko00190//Oxidative phosphorylation                                                                                                                                                                                                                       |
| PA1343 | <i>PA1343</i> | -1.235 | sn-glycerol-3-phosphate transporter                                      | -                                                                                                                                                                                                                                                        |
| PA1349 | <i>PA1349</i> | 1.297  | dehydrogenase                                                            | -                                                                                                                                                                                                                                                        |
| PA1353 | <i>PA1353</i> | 1.736  | VOC family protein                                                       | -                                                                                                                                                                                                                                                        |
| PA1380 | <i>PA1380</i> | 1.365  | transcriptional regulator                                                | -                                                                                                                                                                                                                                                        |
| PA1412 | <i>PA1412</i> | 1.651  | major Facilitator Superfamily protein                                    | -                                                                                                                                                                                                                                                        |
|        |               |        |                                                                          | ko01230//Biosynthesis of amino acids;ko00650//Butanoate metabolism;ko01210//2-Oxocarboxylic acid metabolism;ko00770//Pantothenate and CoA biosynthesis;ko00290//Valine, leucine and isoleucine biosynthesis;ko00660//C5-Branched dibasic acid metabolism |
| PA1417 | <i>PA1417</i> | -1.231 | probable decarboxylase                                                   |                                                                                                                                                                                                                                                          |
| PA1420 | <i>PA1420</i> | 3.131  | Undecaprenyl pyrophosphate synthase                                      | -                                                                                                                                                                                                                                                        |
| PA1423 | <i>bdlA</i>   | -1.469 | pili assembly chaperone                                                  | ko02020//Two-component system;ko02030//Bacterial chemotaxis                                                                                                                                                                                              |
| PA1428 | <i>PA1428</i> | 1.301  | GNAT family N-acetyltransferase                                          | -                                                                                                                                                                                                                                                        |
| PA1435 | <i>PA1435</i> | -1.252 | resistance-nodulation-cell division (RND) efflux membrane fusion protein | -                                                                                                                                                                                                                                                        |
| PA1441 | <i>PA1441</i> | -2.471 | flagellar hook-length control protein FliK                               | ko02040//Flagellar assembly                                                                                                                                                                                                                              |
| PA1442 | <i>PA1442</i> | 1.282  | flagellar basal body protein FliL                                        | -                                                                                                                                                                                                                                                        |
| PA1467 | <i>PA1467</i> | -2.516 | transcriptional regulator                                                | -                                                                                                                                                                                                                                                        |
| PA1476 | <i>ccmB</i>   | 1.304  | heme exporter protein B                                                  | ko02010//ABC transporters                                                                                                                                                                                                                                |

|        |               |        |                                             |                                                                                                                                                                                                                   |
|--------|---------------|--------|---------------------------------------------|-------------------------------------------------------------------------------------------------------------------------------------------------------------------------------------------------------------------|
| PA1487 | <i>PA1487</i> | -1.280 | carbohydrate kinase                         | ko00561//Glycerolipid metabolism<br>ko01230//Biosynthesis of amino acids;<br>ko01200//Carbon metabolism;<br>ko00230//Purine metabolism;<br>ko00620//Pyruvate metabolism;<br>ko00010//Glycolysis / Gluconeogenesis |
| PA1498 | <i>pykF</i>   | 1.853  | pyruvate kinase                             | ko00630//Glyoxylate and dicarboxylate metabolism                                                                                                                                                                  |
| PA1500 | <i>PA1500</i> | -1.378 | oxidoreductase                              | -                                                                                                                                                                                                                 |
| PA1545 | <i>PA1545</i> | -1.612 | Uncharacterised protein                     | -                                                                                                                                                                                                                 |
| PA1561 | <i>aer</i>    | -1.780 | aerotaxis receptor Aer                      | ko02020//Two-component system;<br>ko02030//Bacterial chemotaxis                                                                                                                                                   |
| PA1594 | <i>PA1594</i> | 1.231  | thioesterase, partial                       | -                                                                                                                                                                                                                 |
| PA1596 | <i>htpG</i>   | -1.902 | chaperone protein HtpG                      | -                                                                                                                                                                                                                 |
| PA1608 | <i>PA1608</i> | -1.388 | chemotaxis transducer                       | ko02020//Two-component system;<br>ko02030//Bacterial chemotaxis                                                                                                                                                   |
| PA1635 | <i>kdpC</i>   | -2.520 | potassium-transporting ATPase subunit C     | ko02020//Two-component system<br>ko00250//Alanine, aspartate and glutamate metabolism;<br>ko00220//Arginine biosynthesis;<br>ko00471//D-Glutamine and D-glutamate metabolism                                      |
| PA1638 | <i>PA1638</i> | 1.235  | glutaminase                                 | -                                                                                                                                                                                                                 |
| PA1657 | <i>PA1657</i> | -1.517 | type VI secretion system-associated protein | -                                                                                                                                                                                                                 |
| PA1658 | <i>PA1658</i> | -1.572 | EvpB/family type VI secretion protein       | -                                                                                                                                                                                                                 |
| PA1659 | <i>PA1659</i> | -1.241 | type VI secretion protein                   | -                                                                                                                                                                                                                 |
| PA1660 | <i>PA1660</i> | -1.291 | type VI secretion protein                   | -                                                                                                                                                                                                                 |

|        |               |        |                                                    |                                     |
|--------|---------------|--------|----------------------------------------------------|-------------------------------------|
| PA1662 | <i>PA1662</i> | -1.393 | ClpA/B-type protease                               | ko03070//Bacterial secretion system |
| PA1663 | <i>PA1663</i> | -1.560 | transcriptional regulator                          | -                                   |
| PA1665 | <i>PA1665</i> | -1.299 | signal peptide protein                             | -                                   |
| PA1666 | <i>PA1666</i> | -1.372 | Type VI secretion lipoprotein/VasD                 | ko03070//Bacterial secretion system |
| PA1667 | <i>PA1667</i> | -1.634 | type VI secretion protein                          | -                                   |
| PA1668 | <i>PA1668</i> | -1.852 | membrane protein                                   | ko03070//Bacterial secretion system |
| PA1669 | <i>PA1669</i> | -1.546 | type VI secretion protein IcmF                     | ko03070//Bacterial secretion system |
| PA1671 | <i>stkI</i>   | -1.234 | serine-threonine kinase Stk1                       | -                                   |
| PA1679 | <i>PA1679</i> | -2.013 | Uncharacterized protein PAE221_02692               | -                                   |
| PA1698 | <i>popN</i>   | 1.485  | type III secretion outer membrane protein PopN     | ko03070//Bacterial secretion system |
| PA1699 | <i>PA1699</i> | 1.227  | Pcr1                                               | -                                   |
| PA1702 | <i>PA1702</i> | 3.059  | chaperone protein yscY                             | -                                   |
| PA1703 | <i>pcrD</i>   | 1.205  | type III secretory apparatus protein PcrD          | ko03070//Bacterial secretion system |
| PA1705 | <i>pcrG</i>   | 1.250  | type III secretion regulator                       | -                                   |
| PA1710 | <i>exsC</i>   | 1.224  | exoenzyme S synthesis protein ExsC                 | -                                   |
| PA1715 | <i>pscB</i>   | 1.291  | type III export apparatus protein                  | -                                   |
| PA1718 | <i>pscE</i>   | -1.382 | type III export protein PscE                       | -                                   |
| PA1727 | <i>mucR</i>   | -1.502 | bifunctional diguanylate cyclase/phosphodiesterase | -                                   |
| PA1747 | <i>PA1747</i> | -1.327 | putative secreted protein                          | -                                   |
| PA1844 | <i>PA1844</i> | 2.029  | Uncharacterized protein PAE221_01822               | -                                   |
| PA1845 | <i>PA1845</i> | 2.353  | Uncharacterised protein                            | -                                   |
| PA1852 | <i>PA1852</i> | 1.872  | Uncharacterized protein PAE221_01813               | -                                   |
| PA1864 | <i>PA1864</i> | -1.775 | transcriptional regulator                          | -                                   |
| PA1884 | <i>PA1884</i> | 1.270  | transcriptional regulator                          | -                                   |
| PA1888 | <i>PA1888</i> | -1.264 | Uncharacterised protein                            | -                                   |

|        |               |        |                                                          |                                                                                                                                                                                                    |
|--------|---------------|--------|----------------------------------------------------------|----------------------------------------------------------------------------------------------------------------------------------------------------------------------------------------------------|
| PA1899 | <i>phzA2</i>  | 1.337  | phenazine biosynthesis protein                           | -                                                                                                                                                                                                  |
| PA1902 | <i>phzD2</i>  | -1.698 | phenazine biosynthesis protein PhzD                      | -                                                                                                                                                                                                  |
| PA1903 | <i>phzE2</i>  | -1.324 | phenazine biosynthesis protein PhzE                      | -                                                                                                                                                                                                  |
| PA1904 | <i>phzF2</i>  | -1.369 | 2,3-dihydro-3-hydroxyanthranilate isomerase              | -                                                                                                                                                                                                  |
| PA1912 | <i>femI</i>   | -2.770 | ECF sigma factor FemI                                    | -                                                                                                                                                                                                  |
| PA1913 | <i>PA1913</i> | -5.281 | Uncharacterized protein PAE221_00740                     | -                                                                                                                                                                                                  |
| PA1920 | <i>nrdD</i>   | -1.281 | anaerobic ribonucleoside triphosphate reductase          | ko00230//Purine metabolism;ko00240//Pyrimidine metabolism                                                                                                                                          |
| PA1947 | <i>rbsA</i>   | -1.334 | ribose transporter RbsA                                  | ko02010//ABC transporters                                                                                                                                                                          |
| PA1948 | <i>rbsC</i>   | -1.340 | ABC transporter permease                                 | ko02010//ABC transporters                                                                                                                                                                          |
| PA1957 | <i>PA1957</i> | 1.270  | N-acetylglucosamine-6-sulfatase                          | -                                                                                                                                                                                                  |
| PA1967 | <i>PA1967</i> | -2.970 | Uncharacterised protein                                  | -                                                                                                                                                                                                  |
| PA1968 | <i>PA1968</i> | 1.207  | Uncharacterised protein                                  | -                                                                                                                                                                                                  |
| PA1976 | <i>ercS'</i>  | -1.238 | hybrid sensor histidine kinase/response regulator        | -                                                                                                                                                                                                  |
| PA1988 | <i>pqqD</i>   | -1.693 | coenzyme PQQ synthesis protein D                         | -                                                                                                                                                                                                  |
| PA1992 | <i>ercS</i>   | -1.635 | sensor histidine kinase                                  | -                                                                                                                                                                                                  |
| PA2000 | <i>dhcB</i>   | -1.397 | Succinyl-CoA:3-ketoacid coenzyme A transferase subunit B | ko00280//Valine, leucine and isoleucine degradation;ko00650//Butanoate metabolism;ko00072//Synthesis and degradation of ketone bodies                                                              |
| PA2001 | <i>atoB</i>   | -1.365 | acetyl-CoA acetyltransferase                             | ko02020//Two-component system;ko01200//Carbon metabolism;ko00620//Pyruvate metabolism;ko00630//Glyoxylate and dicarboxylate metabolism;ko01212//Fatty acid metabolism;ko00280//Valine, leucine and |

|        |               |         |                                        |                                                                                                                                                                                                                                                                                                           |
|--------|---------------|---------|----------------------------------------|-----------------------------------------------------------------------------------------------------------------------------------------------------------------------------------------------------------------------------------------------------------------------------------------------------------|
| PA2004 | <i>PA2004</i> | -1.326  | citrate transporter family protein     | -                                                                                                                                                                                                                                                                                                         |
| PA2013 | <i>liuC</i>   | -1.311  | gamma-carboxygeranoyl-CoA hydratase    | isoleucine degradation;ko00640//Propanoate metabolism;ko00650//Butanoate metabolism;ko00362//Benzoate degradation;ko00071//Fatty acid degradation;ko00380//Tryptophan metabolism;ko00310//Lysine degradation;ko00900//Terpenoid backbone biosynthesis;ko00072//Synthesis and degradation of ketone bodies |
| PA2027 | <i>PA2027</i> | 2.036   | Uncharacterized protein PAE221_00397   | -                                                                                                                                                                                                                                                                                                         |
| PA2029 | <i>PA2029</i> | 1.285   | winged helix-turn helix family protein | -                                                                                                                                                                                                                                                                                                         |
| PA2036 | <i>PA2036</i> | -1.579  | methyltransferase domain protein       | -                                                                                                                                                                                                                                                                                                         |
| PA2040 | <i>PA2040</i> | -1.249  | glutamine synthetase                   | ko02020//Two-component system;ko01230//Biosynthesis of amino acids;ko00630//Glyoxylate and dicarboxylate metabolism;ko00910//Nitrogen metabolism;ko00250//Alanine, aspartate and glutamate metabolism;ko00220//Arginine biosynthesis                                                                      |
| PA2048 | <i>PA2048</i> | -12.152 | antibiotic biosynthesis monooxygenase  | -                                                                                                                                                                                                                                                                                                         |
| PA2056 | <i>PA2056</i> | -1.745  | LysR family transcriptional regulator  | -                                                                                                                                                                                                                                                                                                         |
| PA2061 | <i>PA2061</i> | 1.617   | ABC transporter ATP-binding protein    | ko02010//ABC transporters                                                                                                                                                                                                                                                                                 |
| PA2096 | <i>PA2096</i> | -1.316  | transcriptional regulator              | -                                                                                                                                                                                                                                                                                                         |

|         |                |        |                                                         |                                                                                                            |
|---------|----------------|--------|---------------------------------------------------------|------------------------------------------------------------------------------------------------------------|
| PA2099  | <i>PA2099</i>  | -2.643 | short-chain dehydrogenase                               | -                                                                                                          |
| PA2110  | <i>PA2110</i>  | -2.114 | allophanate hydrolase subunit 2 family protein          | -                                                                                                          |
| PA2112  | <i>PA2112</i>  | -1.807 | LamB/YcsF family protein                                | -                                                                                                          |
| PA2113  | <i>opdO</i>    | -1.439 | pyroglutamate porin                                     | -                                                                                                          |
| PA2134  | <i>PA2134</i>  | 1.335  | membrane protein                                        | -                                                                                                          |
| PA2136  | <i>PA2136</i>  | -1.688 | Uncharacterized protein PAE221_01703                    | -                                                                                                          |
| PA2137  | <i>PA2137</i>  | 2.860  | histidine kinase                                        | -                                                                                                          |
| PA2138  | <i>PA2138</i>  | 3.330  | multifunctional non-homologous end joining protein LigD | ko03450//Non-homologous end-joining                                                                        |
| PA2147  | <i>katE</i>    | 1.410  | catalase HPII                                           | ko01200//Carbon metabolism;ko00630//Glyoxylate and dicarboxylate metabolism;ko00380//Tryptophan metabolism |
| PA2148  | <i>PA2148</i>  | 1.813  | methyltransferase                                       | -                                                                                                          |
| PA2154  | <i>PA2154</i>  | 1.309  | membrane protein                                        | -                                                                                                          |
| PA2160  | <i>PA2160</i>  | 1.920  | glycosyl hydrolase                                      | ko00500//Starch and sucrose metabolism                                                                     |
| PA2161  | <i>PA2161</i>  | 2.983  | Protein of uncharacterised function (DUF2934)           | -                                                                                                          |
| PA2162  | <i>PA2162</i>  | 1.438  | malto-oligosyltrehalose synthase                        | ko00500//Starch and sucrose metabolism                                                                     |
| PA2164  | <i>PA2164</i>  | 1.268  | glycosyl hydrolase                                      | ko00500//Starch and sucrose metabolism                                                                     |
| PA2166  | <i>PA2166</i>  | 2.361  | Protein of uncharacterised function (DUF3509)           | -                                                                                                          |
| PA2173a | <i>PA2173a</i> | 2.226  | Uncharacterised protein                                 | -                                                                                                          |
| PA2174  | <i>PA2174</i>  | 1.656  | Uncharacterised protein                                 | -                                                                                                          |
| PA2203  | <i>PA2203</i>  | -2.285 | amino acid permease                                     | -                                                                                                          |
| PA2204  | <i>PA2204</i>  | -2.799 | ABC transporter                                         | -                                                                                                          |
| PA2213  | <i>PA2213</i>  | 1.463  | porin                                                   | -                                                                                                          |
| PA2217  | <i>PA2217</i>  | -1.644 | aldehyde dehydrogenase                                  | ko01220//Degradation of aromatic                                                                           |



|         |                |        |                                                      |                                                                                        |
|---------|----------------|--------|------------------------------------------------------|----------------------------------------------------------------------------------------|
|         |                |        |                                                      | compounds;ko00930//Caprolactam degradation                                             |
| PA2225  | <i>PA2225</i>  | 1.565  | Uncharacterised protein                              | -                                                                                      |
| PA2259  | <i>ptxS</i>    | -1.244 | transcriptional regulator PtxS                       | -                                                                                      |
| PA2274  | <i>PA2274</i>  | -1.440 | antibiotic biosynthesis monooxygenase family protein | -                                                                                      |
| PA2279  | <i>arsC</i>    | -2.050 | low molecular weight phosphatase                     | -                                                                                      |
| PA2287  | <i>PA2287</i>  | -1.249 | Uncharacterised protein                              | -                                                                                      |
| PA2312a | <i>PA2312a</i> | 2.133  | Uncharacterised protein                              | -                                                                                      |
| PA2314  | <i>PA2314</i>  | -2.174 | MFS transporter                                      | -                                                                                      |
|         |                |        |                                                      | ko01200//Carbon                                                                        |
| PA2323  | <i>PA2323</i>  | -1.301 | glyceraldehyde-3-phosphate dehydrogenase             | metabolism;ko00010//Glycolysis /<br>Gluconeogenesis;ko00030//Pentose phosphate pathway |
| PA2334  | <i>PA2334</i>  | 2.738  | transcriptional regulator                            | -                                                                                      |
| PA2350  | <i>PA2350</i>  | 1.458  | methionine import ATP-binding protein MetN 1         | ko02010//ABC transporters                                                              |
| PA2374  | <i>PA2374</i>  | 1.304  | MORN repeat variant family protein                   | -                                                                                      |
| PA2384  | <i>PA2384</i>  | -3.519 | ferric uptake regulator, Fur family                  | -                                                                                      |
| PA2386  | <i>pvdA</i>    | -1.765 | L-ornithine N5-oxygenase                             | -                                                                                      |
| PA2391  | <i>opmQ</i>    | -1.477 | probable outer membrane protein precursor            | -                                                                                      |
| PA2395  | <i>pvdO</i>    | -1.553 | pyoverdine biosynthesis protein PvdO                 | -                                                                                      |
| PA2398  | <i>fjpvA</i>   | -1.342 | ferripyoverdine receptor                             | -                                                                                      |
| PA2404  | <i>PA2404</i>  | -1.225 | PA2404                                               | -                                                                                      |
| PA2407  | <i>PA2407</i>  | -1.676 | adhesion protein                                     | ko02010//ABC transporters                                                              |
| PA2408  | <i>PA2408</i>  | -2.442 | ABC transporter ATP-binding protein                  | ko02010//ABC transporters                                                              |
| PA2409  | <i>PA2409</i>  | -3.708 | ABC transporter permease                             | ko02010//ABC transporters                                                              |
| PA2462  | <i>PA2462</i>  | -2.249 | hemagglutinin                                        | -                                                                                      |

|        |               |        |                                                              |                                                                                                                                                                                                                                                                                                                                                                                                        |
|--------|---------------|--------|--------------------------------------------------------------|--------------------------------------------------------------------------------------------------------------------------------------------------------------------------------------------------------------------------------------------------------------------------------------------------------------------------------------------------------------------------------------------------------|
| PA2463 | <i>PA2463</i> | -3.458 | hemolysin secretion/activation ShlB/FhaC/HecB family protein | -                                                                                                                                                                                                                                                                                                                                                                                                      |
| PA2466 | <i>foxA</i>   | -1.274 | ferrioxamine receptor FoxA                                   | -                                                                                                                                                                                                                                                                                                                                                                                                      |
| PA2470 | <i>gtdA</i>   | -1.488 | gentsitate 1,2-dioxygenase                                   | ko00350//Tyrosine metabolism<br>ko00362//Benzoate<br>degradation;ko01220//Degradation of aromatic<br>compounds;ko00364//Fluorobenzoate<br>degradation;ko00361//Chlorocyclohexane and<br>chlorobenzene degradation;ko00623//Toluene<br>degradation<br>ko00362//Benzoate<br>degradation;ko01220//Degradation of aromatic<br>compounds;ko00364//Fluorobenzoate<br>degradation;ko00622//Xylene degradation |
| PA2507 | <i>catA</i>   | -1.461 | catechol 1,2-dioxygenase                                     |                                                                                                                                                                                                                                                                                                                                                                                                        |
| PA2518 | <i>xytX</i>   | 1.822  | toluate 1,2-dioxygenase subunit alpha                        |                                                                                                                                                                                                                                                                                                                                                                                                        |
| PA2538 | <i>PA2538</i> | 1.354  | Uncharacterised protein                                      | -                                                                                                                                                                                                                                                                                                                                                                                                      |
| PA2552 | <i>PA2552</i> | -1.585 | acyl-CoA dehydrogenase                                       | ko00281//Geraniol degradation<br>ko02020//Two-component<br>system;ko01200//Carbon<br>metabolism;ko00620//Pyruvate<br>metabolism;ko00630//Glyoxylate and<br>dicarboxylate metabolism;ko01212//Fatty acid<br>metabolism;ko00280//Valine, leucine and<br>isoleucine degradation;ko00640//Propanoate<br>metabolism;ko00650//Butanoate<br>metabolism;ko00362//Benzoate<br>degradation;ko00071//Fatty acid   |
| PA2553 | <i>PA2553</i> | -1.413 | acyl-CoA thiolase                                            |                                                                                                                                                                                                                                                                                                                                                                                                        |

|         |                |        |                                            |                                                                                                                                                                                 |
|---------|----------------|--------|--------------------------------------------|---------------------------------------------------------------------------------------------------------------------------------------------------------------------------------|
|         |                |        |                                            | degradation;ko00380//Tryptophan<br>metabolism;ko00310//Lysine<br>degradation;ko00900//Terpenoid backbone<br>biosynthesis;ko00072//Synthesis and degradation<br>of ketone bodies |
| PA2557  | <i>PA2557</i>  | -1.407 | AMP-binding protein                        | -                                                                                                                                                                               |
| PA2567  | <i>PA2567</i>  | -1.534 | sensor domain-containing phosphodiesterase | -                                                                                                                                                                               |
| PA2607  | <i>PA2607</i>  | 1.226  | DsrH family protein                        | ko04122//Sulfur relay system                                                                                                                                                    |
| PA2652  | <i>PA2652</i>  | -2.108 | methyl-accepting chemotaxis protein        | ko02020//Two-component<br>system;ko02030//Bacterial chemotaxis                                                                                                                  |
| PA2675  | <i>PA2675</i>  | 1.909  | type II secretion system protein           | ko03070//Bacterial secretion system                                                                                                                                             |
| PA2701  | <i>PA2701</i>  | 1.302  | major facilitator superfamily transporter  | -                                                                                                                                                                               |
| PA2714  | <i>PA2714</i>  | -1.419 | molybdopterin oxidoreductase               | -                                                                                                                                                                               |
| PA2746a | <i>PA2746a</i> | 1.600  | predicted protein                          | -                                                                                                                                                                               |
| PA2752  | <i>PA2752</i>  | 2.230  | Inner membrane protein YqaA                | -                                                                                                                                                                               |
| PA2754a | <i>PA2754a</i> | -2.690 | filamentous hemagglutinin                  | -                                                                                                                                                                               |
| PA2766  | <i>PA2766</i>  | 1.394  | transcriptional regulator                  | -                                                                                                                                                                               |
| PA2773  | <i>PA2773</i>  | 1.970  | membrane protein                           | -                                                                                                                                                                               |
| PA2788  | <i>PA2788</i>  | -2.143 | chemotaxis transducer                      | -                                                                                                                                                                               |
| PA2862  | <i>lipA</i>    | -1.686 | lactonizing lipase                         | ko00561//Glycerolipid metabolism                                                                                                                                                |
| PA2867  | <i>PA2867</i>  | -3.315 | chemotaxis transducer                      | -                                                                                                                                                                               |
| PA2879  | <i>PA2879</i>  | -1.544 | transcriptional regulator                  | -                                                                                                                                                                               |
| PA2887  | <i>atuB</i>    | -2.299 | citronellol catabolism dehydrogenase       | ko00281//Geraniol degradation                                                                                                                                                   |
| PA2890  | <i>atuE</i>    | -4.298 | isohexenylglutaconyl-CoA hydratase         | ko00281//Geraniol degradation                                                                                                                                                   |
| PA2928  | <i>PA2928</i>  | 1.633  | Uncharacterised protein                    | -                                                                                                                                                                               |
| PA3009  | <i>PA3009</i>  | 1.390  | ABC transporter ATP-binding protein        | -                                                                                                                                                                               |

|        |               |        |                                                                     |                                                                                                                |
|--------|---------------|--------|---------------------------------------------------------------------|----------------------------------------------------------------------------------------------------------------|
| PA3038 | <i>PA3038</i> | -2.391 | porin                                                               | -                                                                                                              |
| PA3039 | <i>PA3039</i> | 1.993  | transporter                                                         | -                                                                                                              |
| PA3067 | <i>PA3067</i> | 1.814  | transcriptional regulator                                           | -                                                                                                              |
| PA3079 | <i>PA3079</i> | -1.889 | patched family protein                                              | -                                                                                                              |
| PA3126 | <i>ibpA</i>   | -1.849 | heat-shock protein IbpA                                             | -                                                                                                              |
| PA3136 | <i>PA3136</i> | 1.398  | secretion protein                                                   | -                                                                                                              |
| PA3181 | <i>PA3181</i> | -1.330 | keto-hydroxyglutarate-aldolase/keto-deoxy-phosphogluconate aldolase | ko01200//Carbon metabolism;ko00630//Glyoxylate and dicarboxylate metabolism;ko00030//Pentose phosphate pathway |
| PA3182 | <i>pgl</i>    | -2.220 | 6-phosphogluconolactonase                                           | ko01200//Carbon metabolism;ko00030//Pentose phosphate pathway                                                  |
| PA3183 | <i>zwf</i>    | -2.022 | glucose-6-phosphate 1-dehydrogenase                                 | ko01200//Carbon metabolism;ko00030//Pentose phosphate pathway;ko00480//Glutathione metabolism                  |
| PA3186 | <i>oprB</i>   | -3.460 | porin B                                                             | -                                                                                                              |
| PA3187 | <i>PA3187</i> | -2.904 | ABC transporter ATP-binding protein                                 | ko02010//ABC transporters                                                                                      |
| PA3189 | <i>PA3189</i> | -1.454 | sugar ABC transporter permease                                      | ko02010//ABC transporters                                                                                      |
| PA3190 | <i>PA3190</i> | -1.862 | sugar ABC transporter substrate-binding protein                     | ko02010//ABC transporters                                                                                      |
| PA3192 | <i>gltR</i>   | -1.969 | two-component response regulator GltR                               | -                                                                                                              |
| PA3194 | <i>edd</i>    | -1.813 | phosphogluconate dehydratase                                        | ko01200//Carbon metabolism;ko00030//Pentose phosphate pathway                                                  |
| PA3195 | <i>gapA</i>   | -1.919 | glyceraldehyde 3-phosphate dehydrogenase                            | ko01230//Biosynthesis of amino acids;ko01200//Carbon metabolism;ko00010//Glycolysis / Gluconeogenesis          |

|        |                     |         |                                                          |   |                                                                                                                                               |
|--------|---------------------|---------|----------------------------------------------------------|---|-----------------------------------------------------------------------------------------------------------------------------------------------|
| PA3209 | <i>PA3209</i>       | 12.001  | zinc/iron-chelating domain-containing protein            | - | ko00230//Purine metabolism;ko00240//Pyrimidine metabolism;ko03440//Homologous recombination;ko03430//Mismatch repair;ko03030//DNA replication |
| PA3232 | <i>PA3232</i>       | -1.374  | DNA polymerase III subunit epsilon                       | - |                                                                                                                                               |
| PA3233 | <i>PA3233</i>       | -1.808  | cyclic nucleotide-binding domain protein                 | - |                                                                                                                                               |
| PA3234 | <i>PA3234</i>       | -3.020  | acetate permease                                         | - |                                                                                                                                               |
| PA3235 | <i>PA3235</i>       | -2.130  | membrane protein                                         | - |                                                                                                                                               |
| PA3236 | <i>PA3236</i>       | -1.907  | glycine betaine-binding protein                          | - | ko02010//ABC transporters                                                                                                                     |
| PA3282 | <i>PA3282</i>       | -2.139  |                                                          | - |                                                                                                                                               |
| PA3291 | <i>PA3291</i>       | -1.644  | DUF3304 domain-containing protein                        | - |                                                                                                                                               |
| PA3292 | <i>PA3292</i>       | -1.312  | DUF3304 domain-containing protein                        | - |                                                                                                                                               |
| PA3329 | <i>PA3329</i>       | -1.329  | Malonyl CoA-acyl carrier protein transacylase            | - |                                                                                                                                               |
| PA3330 | <i>PA3330</i>       | -1.262  | short-chain dehydrogenase                                | - |                                                                                                                                               |
| PA3353 | <i>PA3353</i>       | -1.538  | pilus assembly protein PilZ                              | - |                                                                                                                                               |
| PA3358 | <i>PA3358</i>       | -11.948 | EamA family transporter                                  | - |                                                                                                                                               |
| PA3376 | <i>PA3376</i>       | -2.276  | phosphonate C-P lyase system protein PhnK                | - |                                                                                                                                               |
| PA3385 | <i>amrZ</i>         | -1.372  | alginate and motility regulator Z                        | - |                                                                                                                                               |
| PA3425 | <i>PA3425</i>       | 1.219   | cupin                                                    | - |                                                                                                                                               |
| PA3442 | <i>PA3442</i>       | -1.243  | aliphatic sulfonates ABC transporter ATP-binding subunit | - | ko02010//ABC transporters;ko00920//Sulfur metabolism                                                                                          |
| PA3444 | <i>PA3444</i>       | -1.421  | alkanesulfonate monooxygenase                            | - | ko00920//Sulfur metabolism                                                                                                                    |
| PA3484 | <i>PA3484(Tse3)</i> | -1.459  | Uncharacterized protein PAE221_01533                     | - |                                                                                                                                               |
| PA3487 | <i>pldA</i>         | -1.255  | phospholipase D                                          | - |                                                                                                                                               |
| PA3502 | <i>PA3502</i>       | -2.117  | Uncharacterised protein                                  | - |                                                                                                                                               |

|           |               |        |                                                                          |                                                                                                                                                                                                                                                          |
|-----------|---------------|--------|--------------------------------------------------------------------------|----------------------------------------------------------------------------------------------------------------------------------------------------------------------------------------------------------------------------------------------------------|
| PA3506    | <i>PA3506</i> | -1.850 | probable decarboxylase                                                   | ko01230//Biosynthesis of amino acids;ko00650//Butanoate metabolism;ko01210//2-Oxocarboxylic acid metabolism;ko00770//Pantothenate and CoA biosynthesis;ko00290//Valine, leucine and isoleucine biosynthesis;ko00660//C5-Branched dibasic acid metabolism |
| PA3507    | <i>PA3507</i> | -2.411 | short-chain dehydrogenase                                                | -                                                                                                                                                                                                                                                        |
| PA3508    | <i>PA3508</i> | -2.018 | transcriptional regulator                                                | -                                                                                                                                                                                                                                                        |
| PA3510    | <i>PA3510</i> | -1.481 | cupin domain protein                                                     | -                                                                                                                                                                                                                                                        |
| PA3519    | <i>PA3519</i> | -1.509 | Pyrrroloquinoline quinone (Coenzyme PQQ) biosynthesis protein C          | -                                                                                                                                                                                                                                                        |
| PA3523    | <i>PA3523</i> | -1.438 | resistance-nodulation-cell division (RND) efflux membrane fusion protein | -                                                                                                                                                                                                                                                        |
| PA3526    | <i>PA3526</i> | -2.106 | probable outer membrane protein precursor                                | -                                                                                                                                                                                                                                                        |
| PA3568    | <i>PA3568</i> | -3.847 | propionyl-CoA synthetase                                                 | ko00640//Propanoate metabolism                                                                                                                                                                                                                           |
| PA3569    | <i>mmsB</i>   | -2.780 | 3-hydroxyisobutyrate dehydrogenase                                       | ko00280//Valine, leucine and isoleucine degradation<br>ko01200//Carbon metabolism;ko00280//Valine, leucine and isoleucine                                                                                                                                |
| PA3570    | <i>mmsA</i>   | -2.312 | methylmalonate-semialdehyde dehydrogenase                                | degradation;ko00640//Propanoate metabolism;ko00410//beta-Alanine metabolism;ko00562//Inositol phosphate                                                                                                                                                  |
| PA3593    | <i>PA3593</i> | 1.591  | acyl-CoA dehydrogenase                                                   | -                                                                                                                                                                                                                                                        |
| PA3601    | <i>PA3601</i> | -2.114 | 50S ribosomal protein L31                                                | ko03010//Ribosome                                                                                                                                                                                                                                        |
| Continued |               |        |                                                                          |                                                                                                                                                                                                                                                          |

|        |               |        |                                                                                   |                                                                                                                 |
|--------|---------------|--------|-----------------------------------------------------------------------------------|-----------------------------------------------------------------------------------------------------------------|
| PA3612 | <i>PA3612</i> | 1.463  | Putative cytoplasmic protein                                                      | -                                                                                                               |
| PA3662 | <i>PA3662</i> | -3.114 | Uncharacterised protein                                                           | -                                                                                                               |
| PA3714 | <i>PA3714</i> | -1.513 | LuxR family transcriptional regulator                                             | ko02020//Two-component system                                                                                   |
| PA3720 | <i>PA3720</i> | -1.775 | Uncharacterised protein                                                           | -                                                                                                               |
| PA3721 | <i>nalC</i>   | -1.702 | transcriptional regulator                                                         | -                                                                                                               |
| PA3722 | <i>PA3722</i> | -2.087 | Uncharacterised protein                                                           | -                                                                                                               |
| PA3727 | <i>PA3727</i> | -1.526 | nuclease                                                                          | -                                                                                                               |
| PA3728 | <i>PA3728</i> | -1.759 | AAA domain family protein                                                         | -                                                                                                               |
| PA3729 | <i>PA3729</i> | -1.637 | Inner membrane protein YqiK                                                       | -                                                                                                               |
| PA3731 | <i>PA3731</i> | -1.209 | phage shock protein A                                                             | -                                                                                                               |
| PA3740 | <i>PA3740</i> | -1.216 | Type II secretory pathway, ATPase PulE/Tfp<br>pilus assembly pathway, ATPase PilB | -                                                                                                               |
| PA3745 | <i>rpsP</i>   | 1.231  | 30S ribosomal protein S16                                                         | ko03010//Ribosome                                                                                               |
| PA3758 | <i>PA3758</i> | -1.434 | N-acetylglucosamine-6-phosphate deacetylase                                       | ko00520//Amino sugar and nucleotide sugar<br>metabolism                                                         |
| PA3759 | <i>PA3759</i> | -1.294 | aminotransferase                                                                  | ko00250//Alanine, aspartate and glutamate<br>metabolism;ko00520//Amino sugar and<br>nucleotide sugar metabolism |
| PA3760 | <i>PA3760</i> | -1.408 | phosphoenolpyruvate--protein phosphotransferase                                   | -                                                                                                               |
| PA3761 | <i>PA3761</i> | -1.296 | N-acetyl-D-glucosamine phosphotransferase<br>system transporter                   | ko00520//Amino sugar and nucleotide sugar<br>metabolism;ko02060//Phosphotransferase system<br>(PTS)             |
| PA3838 | <i>PA3838</i> | -1.475 | ABC transporter ATP-binding protein                                               | -                                                                                                               |
| PA3842 | <i>PA3842</i> | 1.216  | chaperone                                                                         | -                                                                                                               |
| PA3856 | <i>PA3856</i> | 1.254  | ketosteroid isomerase                                                             | -                                                                                                               |
| PA3867 | <i>PA3867</i> | 1.511  | DNA invertase                                                                     | -                                                                                                               |

|        |               |        |                                             |                                                                                 |
|--------|---------------|--------|---------------------------------------------|---------------------------------------------------------------------------------|
| PA3870 | <i>moaA1</i>  | 1.329  | molybdenum cofactor biosynthesis protein A  | ko00790//Folate biosynthesis;ko04122//Sulfur relay system                       |
| PA3871 | <i>PA3871</i> | 1.444  | peptidyl-prolyl cis-trans isomerase         | -                                                                               |
| PA3873 | <i>narJ</i>   | 1.417  | respiratory nitrate reductase subunit delta | ko02020//Two-component system;ko00910//Nitrogen metabolism                      |
| PA3874 | <i>narH</i>   | 1.383  | respiratory nitrate reductase subunit beta  | ko02020//Two-component system;ko00910//Nitrogen metabolism                      |
| PA3875 | <i>narG</i>   | 1.476  | respiratory nitrate reductase subunit alpha | ko02020//Two-component system;ko00910//Nitrogen metabolism                      |
| PA3876 | <i>narK2</i>  | 1.645  | nitrite extrusion protein 2                 | ko00910//Nitrogen metabolism                                                    |
| PA3884 | <i>PA3884</i> | 12.097 | putative membrane protein                   | -                                                                               |
| PA3923 | <i>PA3923</i> | -1.339 | adhesin                                     | -                                                                               |
| PA3935 | <i>tauD</i>   | -1.871 | taurine dioxygenase                         | ko00920//Sulfur metabolism;ko00430//Taurine and hypotaurine metabolism          |
| PA3937 | <i>PA3937</i> | -1.929 | taurine ABC transporter ATP-binding protein | ko02010//ABC transporters;ko00920//Sulfur metabolism                            |
| PA4022 | <i>PA4022</i> | -1.474 | aldehyde dehydrogenase                      | ko00620//Pyruvate metabolism;ko00010//Glycolysis / Gluconeogenesis              |
| PA4023 | <i>PA4023</i> | -2.337 | transporter                                 | -                                                                               |
| PA4038 | <i>PA4038</i> | 1.567  | possible ABC transporter permease component | -                                                                               |
| PA4072 | <i>PA4072</i> | -1.542 | amino acid permease                         | -                                                                               |
| PA4073 | <i>PA4073</i> | -1.489 | Phenylacetaldehyde dehydrogenase            | ko00360//Phenylalanine metabolism;ko00643//Styrene degradation                  |
| PA4089 | <i>PA4089</i> | 2.707  | 3-ketoacyl-ACP reductase                    | ko01212//Fatty acid metabolism;ko00061//Fatty acid biosynthesis;ko00780//Biotin |



|           |               |        |                                             |                                                                                                                                  |
|-----------|---------------|--------|---------------------------------------------|----------------------------------------------------------------------------------------------------------------------------------|
|           |               |        |                                             | metabolism;ko01040//Biosynthesis of unsaturated fatty acids                                                                      |
| PA4093    | <i>PA4093</i> | -2.515 | thioesterase                                | -                                                                                                                                |
| PA4107    | <i>PA4107</i> | -2.520 | EF-hand domain pair family protein          | -                                                                                                                                |
| PA4124    | <i>hpcB</i>   | -1.495 | 3,4-dihydroxyphenylacetate 2,3-dioxygenase  | ko01220//Degradation of aromatic compounds;ko00350//Tyrosine metabolism                                                          |
| PA4139    | <i>PA4139</i> | -1.531 | Uncharacterized protein PAE221_02180        | -                                                                                                                                |
| PA4140    | <i>PA4140</i> | -1.620 | FAD-linked oxidase                          | -                                                                                                                                |
| PA4151    | <i>acoB</i>   | 1.356  | acetoin catabolism protein AcoB             | ko01200//Carbon metabolism;ko00620//Pyruvate metabolism;ko00010//Glycolysis / Gluconeogenesis;ko00020//Citrate cycle (TCA cycle) |
| PA4171    | <i>PA4171</i> | 1.501  | glutamine amidotransferase                  | -                                                                                                                                |
| PA4188    | <i>PA4188</i> | -1.842 | dihydrodipicolinate synthase family protein | ko01230//Biosynthesis of amino acids;ko00300//Lysine biosynthesis;ko00261//Monobactam biosynthesis                               |
| PA4189    | <i>PA4189</i> | -2.000 | aldehyde dehydrogenase                      | ko00330//Arginine and proline metabolism                                                                                         |
| PA4191    | <i>PA4191</i> | -1.353 | iron oxidase                                | -                                                                                                                                |
| PA4192    | <i>PA4192</i> | -2.193 | ABC transporter ATP-binding protein         | -                                                                                                                                |
| PA4198    | <i>PA4198</i> | -1.273 | acyl-CoA synthetase                         | -                                                                                                                                |
| PA4204    | <i>ppgL</i>   | -1.214 | gluconolactonase PpgL                       | -                                                                                                                                |
| PA4211    | <i>phzB1</i>  | -1.678 | phenazine biosynthesis protein PhzB1        | -                                                                                                                                |
| PA4213    | <i>phzD1</i>  | -1.698 | phenazine biosynthesis protein PhzD         | -                                                                                                                                |
| Continued |               |        |                                             |                                                                                                                                  |
| PA4214    | <i>phzE1</i>  | -1.324 | phenazine biosynthesis protein PhzE         | -                                                                                                                                |
| PA4215    | <i>phzF1</i>  | -1.369 | 2,3-dihydro-3-hydroxyanthranilate isomerase | -                                                                                                                                |

|        |               |        |                                                |                                                                                                                               |
|--------|---------------|--------|------------------------------------------------|-------------------------------------------------------------------------------------------------------------------------------|
| PA4221 | <i>fptA</i>   | -1.568 | Fe(III)-pyochelin outer membrane receptor      | -                                                                                                                             |
| PA4222 | <i>PA4222</i> | -1.774 | ABC transporter ATP-binding protein            | -                                                                                                                             |
| PA4223 | <i>PA4223</i> | -2.059 | ABC transporter ATP-binding protein            | ko02010//ABC transporters                                                                                                     |
| PA4224 | <i>pchG</i>   | -1.551 | pyochelin biosynthetic protein PchG            | ko01053//Biosynthesis of siderophore group nonribosomal peptides                                                              |
| PA4225 | <i>pchF</i>   | -2.527 | pyochelin synthetase                           | ko01053//Biosynthesis of siderophore group nonribosomal peptides                                                              |
| PA4226 | <i>pchE</i>   | -2.000 | dihydroaeruginosic acid synthetase             | ko01053//Biosynthesis of siderophore group nonribosomal peptides                                                              |
| PA4231 | <i>pchA</i>   | -1.843 | salicylate biosynthesis isochorismate synthase | ko00130//Ubiquinone and other terpenoid-quinone biosynthesis;ko01053//Biosynthesis of siderophore group nonribosomal peptides |
| PA4290 | <i>PA4290</i> | -1.329 | chemotaxis transducer                          | ko02020//Two-component system;ko02030//Bacterial chemotaxis                                                                   |
| PA4291 | <i>PA4291</i> | 1.270  | hypothetical protein                           | -                                                                                                                             |
| PA4298 | <i>PA4298</i> | -1.629 | Protein of uncharacterised function (DUF3613)  | -                                                                                                                             |
| PA4306 | <i>flp</i>    | -1.410 | type IVb pilin Flp                             | -                                                                                                                             |
| PA4309 | <i>pctA</i>   | -1.419 | methyl-accepting chemotaxis protein PctA       | ko02020//Two-component system;ko02030//Bacterial chemotaxis                                                                   |
| PA4310 | <i>pctB</i>   | -1.687 | methyl-accepting chemotaxis protein PctB       | ko02020//Two-component system;ko02030//Bacterial chemotaxis                                                                   |
| PA4324 | <i>PA4324</i> | -2.674 | pilus assembly protein PilZ                    | -                                                                                                                             |
| PA4326 | <i>PA4326</i> | -2.200 | lipoprotein                                    | -                                                                                                                             |
| PA4332 | <i>PA4332</i> | -1.419 | FOG: GGDEF domain                              | -                                                                                                                             |
| PA4500 | <i>PA4500</i> | -1.586 | ABC transporter                                | ko02010//ABC transporters;ko02030//Bacterial                                                                                  |

|        |               |        |                                             |                                                             |
|--------|---------------|--------|---------------------------------------------|-------------------------------------------------------------|
| PA4501 | <i>opdP</i>   | -2.560 | porin                                       | chemotaxis                                                  |
| PA4502 | <i>PA4502</i> | -2.093 | ABC transporter                             | -                                                           |
| PA4504 | <i>PA4504</i> | -1.624 | ABC transporter permease                    | ko02010//ABC transporters;ko02030//Bacterial chemotaxis     |
| PA4505 | <i>PA4505</i> | -1.528 | ABC transporter ATP-binding protein         | ko02010//ABC transporters                                   |
| PA4506 | <i>PA4506</i> | -1.516 | peptide ABC transporter ATP-binding protein | ko02010//ABC transporters                                   |
| PA4520 | <i>PA4520</i> | -1.391 | chemotaxis transducer                       | ko02020//Two-component system;ko02030//Bacterial chemotaxis |
| PA4563 | <i>rpsT</i>   | 1.423  | 30S ribosomal protein S20                   | ko03010//Ribosome                                           |
| PA4571 | <i>PA4571</i> | -2.853 | cytochrome c                                | -                                                           |
| PA4573 | <i>PA4573</i> | 1.360  | cation transporter                          | -                                                           |
| PA4582 | <i>PA4582</i> | -1.434 | SPFH domain / Band 7 family protein         | -                                                           |
| PA4590 | <i>pra</i>    | -1.482 | protein activator                           | -                                                           |
| PA4592 | <i>PA4592</i> | -1.258 | probable outer membrane protein precursor   | -                                                           |
| PA4596 | <i>PA4596</i> | -3.429 | transcriptional regulator                   | -                                                           |
| PA4625 | <i>PA4625</i> | -1.401 | hemagglutination protein                    | -                                                           |
| PA4633 | <i>PA4633</i> | -2.364 | chemotaxis protein                          | ko02020//Two-component system;ko02030//Bacterial chemotaxis |
| PA4644 | <i>PA4644</i> | 1.251  | Tryptophan synthase beta chain like         | -                                                           |
| PA4675 | <i>PA4675</i> | -1.497 | TonB-dependent receptor                     | -                                                           |
| PA4683 | <i>PA4683</i> | -2.179 | Uncharacterized protein PAE221_00037        | -                                                           |
| PA4709 | <i>PA4709</i> | 1.355  | hemin degrading factor                      | -                                                           |
| PA4746 | <i>PA4746</i> | 1.260  | ribosome maturation factor RimP             | -                                                           |
| PA4764 | <i>fur</i>    | 1.299  | ferric uptake regulation protein            | -                                                           |
| PA4766 | <i>PA4766</i> | 2.354  | protein RnfH                                | -                                                           |

|        |               |        |                                                      |                                                             |
|--------|---------------|--------|------------------------------------------------------|-------------------------------------------------------------|
| PA4768 | <i>smpB</i>   | 1.411  | SsrA-binding protein                                 | -                                                           |
| PA4780 | <i>PA4780</i> | 1.611  | serine protein kinase RIO                            | -                                                           |
| PA4789 | <i>PA4789</i> | 1.534  | pyrophosphatase                                      | -                                                           |
| PA4817 | <i>PA4817</i> | 2.426  | zinc/iron-chelating domain-containing protein        | -                                                           |
| PA4843 | <i>PA4843</i> | -4.397 | diguanylate cyclase response regulator               | -                                                           |
| PA4844 | <i>PA4844</i> | -2.290 | chemotaxis transducer                                | -                                                           |
| PA4889 | <i>PA4889</i> | 1.261  | oxidoreductase                                       | -                                                           |
| PA4901 | <i>mdlC</i>   | -1.512 | benzoylformate decarboxylase                         | ko00627//Aminobenzoate degradation                          |
| PA4911 | <i>PA4911</i> | -1.297 | branched-chain amino acid ABC transporter permease   | ko02010//ABC transporters                                   |
| PA4919 | <i>pncB1</i>  | -1.621 | nicotinate phosphoribosyltransferase                 | ko00760//Nicotinate and nicotinamide metabolism             |
| PA4929 | <i>PA4929</i> | -1.840 | sensor domain-containing diguanylate cyclase         | -                                                           |
| PA4989 | <i>PA4989</i> | -1.234 | transcriptional regulator                            | -                                                           |
| PA5054 | <i>hslU</i>   | -1.298 | ATP-dependent protease ATP-binding subunit HslU      | -                                                           |
| PA5072 | <i>PA5072</i> | -1.354 | chemotaxis transducer                                | ko02020//Two-component system;ko02030//Bacterial chemotaxis |
| PA5098 | <i>hutH</i>   | -1.932 | histidine ammonia-lyase                              | ko00340//Histidine metabolism                               |
| PA5099 | <i>PA5099</i> | -1.373 | transporter                                          | -                                                           |
| PA5100 | <i>hutU</i>   | -1.668 | urocanate hydratase                                  | ko00340//Histidine metabolism                               |
| PA5153 | <i>PA5153</i> | -1.940 | amino acid ABC transporter substrate-binding protein | -                                                           |
| PA5154 | <i>PA5154</i> | -1.853 | ABC transporter permease                             | -                                                           |
| PA5155 | <i>PA5155</i> | -1.606 | amino acid ABC transporter permease                  | -                                                           |
| PA5167 | <i>PA5167</i> | -1.207 | C4-dicarboxylate-binding protein                     | ko02020//Two-component system                               |
| PA5181 | <i>PA5181</i> | -1.343 | oxidoreductase                                       | -                                                           |
| PA5285 | <i>PA5285</i> | 1.320  | Uncharacterised protein                              | -                                                           |

|        |               |        |                                            |                                                                                                                                                                                                                                                                       |
|--------|---------------|--------|--------------------------------------------|-----------------------------------------------------------------------------------------------------------------------------------------------------------------------------------------------------------------------------------------------------------------------|
| PA5289 | <i>PA5289</i> | 1.518  | membrane fusogenic activity family protein | -                                                                                                                                                                                                                                                                     |
| PA5383 | <i>PA5383</i> | -1.707 | membrane protein                           | -                                                                                                                                                                                                                                                                     |
| PA5387 | <i>cdhC</i>   | 2.967  | carnitine dehydrogenase                    | -                                                                                                                                                                                                                                                                     |
| PA5396 | <i>PA5396</i> | -1.535 | membrane dipeptidase family protein        | -                                                                                                                                                                                                                                                                     |
| PA5397 | <i>PA5397</i> | -2.565 | hydrocarbon binding protein                | -                                                                                                                                                                                                                                                                     |
| PA5398 | <i>dgcA</i>   | -2.146 | dimethylglycine catabolism protein DgcA    | -                                                                                                                                                                                                                                                                     |
| PA5399 | <i>dgcB</i>   | -1.630 | (Fe-S)-binding protein                     | -                                                                                                                                                                                                                                                                     |
| PA5410 | <i>gbcA</i>   | -1.560 | Rieske (2Fe-2S) protein                    | -                                                                                                                                                                                                                                                                     |
|        |               |        |                                            | ko01230//Biosynthesis of amino acids;ko01200//Carbon metabolism;ko00630//Glyoxylate and dicarboxylate metabolism;ko00260//Glycine, serine and threonine metabolism;ko00680//Methane metabolism;ko00670//One carbon pool by folate;ko00460//Cyanoamino acid metabolism |
| PA5415 | <i>glyA1</i>  | -2.044 | serine hydroxymethyltransferase            | ko00260//Glycine, serine and threonine metabolism                                                                                                                                                                                                                     |
| PA5416 | <i>soxB</i>   | -2.042 | sarcosine oxidase subunit beta             | ko00260//Glycine, serine and threonine metabolism                                                                                                                                                                                                                     |
| PA5417 | <i>soxD</i>   | -2.744 | sarcosine oxidase subunit delta            | ko00260//Glycine, serine and threonine metabolism                                                                                                                                                                                                                     |
| PA5418 | <i>soxA</i>   | -2.625 | sarcosine oxidase subunit alpha            | ko00260//Glycine, serine and threonine metabolism                                                                                                                                                                                                                     |
| PA5419 | <i>soxG</i>   | -1.468 | sarcosine oxidase subunit gamma            | ko00260//Glycine, serine and threonine metabolism                                                                                                                                                                                                                     |
| PA5420 | <i>purU2</i>  | -1.969 | formyltetrahydrofolate deformylase         | ko00630//Glyoxylate and dicarboxylate metabolism;ko00670//One carbon pool by folate                                                                                                                                                                                   |

|        |               |        |                                                    |                                                                                                                          |
|--------|---------------|--------|----------------------------------------------------|--------------------------------------------------------------------------------------------------------------------------|
| PA5421 | <i>fdhA</i>   | -1.876 | glutathione-independent formaldehyde dehydrogenase | ko01200//Carbon metabolism;ko00680//Methane metabolism;ko00625//Chloroalkane and chloroalkene degradation                |
| PA5444 | <i>PA5444</i> | 1.566  | transporter                                        | -                                                                                                                        |
| PA5445 | <i>PA5445</i> | -1.549 | coenzyme A transferase                             | ko01200//Carbon metabolism;ko00620//Pyruvate metabolism;ko00650//Butanoate metabolism;ko00020//Citrate cycle (TCA cycle) |
| PA5462 | <i>PA5462</i> | 1.895  | Holliday junction resolvase                        | -                                                                                                                        |
| PA5491 | <i>PA5491</i> | 1.240  | cytochrome                                         | -                                                                                                                        |
| PA5515 | <i>PA5515</i> | 1.324  | Protein of uncharacterised function (DUF3301)      | -                                                                                                                        |
| PA5536 | <i>PA5536</i> | 2.970  | DksA/TraR family C4-type zinc finger protein       | -                                                                                                                        |
| PA5550 | <i>glmR</i>   | 1.377  | GlmR transcriptional regulator                     | -                                                                                                                        |
| PA5566 | <i>PA5566</i> | -1.603 | hypothetical protein                               | -                                                                                                                        |

---
